# Supplementary material for: Temple stay diet and its impact on gut microbiome and irritable bowel syndrome: a prospective cohort study
Source: Royal Society of Chemistry journal article supplement (doi:10.1039/d4fo06143h), 2025-01-01
Supplement: d4fo06143h3.pdf [file d4fo06143h3.pdf]

Supplementary table 1. Programmed schedule for participants during the temple stay period.

| Time        | Day 1                                                         | Day 2                                    | Day 3                                                               | Day 4                    |
|-------------|---------------------------------------------------------------|------------------------------------------|---------------------------------------------------------------------|--------------------------|
| 04:30-05:30 |                                                               | Dawn Buddhist Ceremony                   | Dawn Buddhist Ceremony                                              | Dawn Buddhist Ceremony   |
| 05:30-06:10 |                                                               | Meal: Morning                            |                                                                     |                          |
| 09:30-10:30 |                                                               | Making a mindfulness talk                | Tea with a monk                                                     | 108 prostrations (bows)  |
| 11:20-12:00 |                                                               | Meal: Lunch                              |                                                                     |                          |
| 13:00-15:00 | Orientation                                                   | Exploring treasure and cultural heritage | Trailing meditation on Gamani-gil (a local path) and Cheonji Pagoda | Departure after cleaning |
| 15:00-16:00 | Room assignment and change in to temple attire                |                                          |                                                                     |                          |
| 16:00-17:00 | Introduction to the temple: A temple walk with a monk         |                                          |                                                                     |                          |
| 17:30-18:00 | Meal: Dinner                                                  |                                          |                                                                     |                          |
| 18:20-19:00 | Temple-bell ringing experience with Evening Buddhist Ceremony |                                          |                                                                     |                          |
| 19:00-20:30 | Walking meditation in the temple grounds with a companion     |                                          |                                                                     |                          |
| 20:30       | Mind-calming and sleep                                        |                                          |                                                                     |                          |

**Supplementary table 2. The standard meal plan during the temple-stay.**

| Meals          | Day 1                                                                                                                           | Day 2                                                                                                                                                                                                                                     | Day 3                                                                                                                                                                                                               | Day 4                                                                                                                                                                                                                                                                |
|----------------|---------------------------------------------------------------------------------------------------------------------------------|-------------------------------------------------------------------------------------------------------------------------------------------------------------------------------------------------------------------------------------------|---------------------------------------------------------------------------------------------------------------------------------------------------------------------------------------------------------------------|----------------------------------------------------------------------------------------------------------------------------------------------------------------------------------------------------------------------------------------------------------------------|
| <b>Morning</b> |                                                                                                                                 | Seasoned soy sauce<br>Pickled perilla leaves<br>Carrot<br>Kimchi with napa cabbage<br>Fuji Apple<br>Seasoned mung bean sprouts<br>Soft tofu<br>Ssamjang<br>Cabbage and cucumber<br>Rice with green peas<br>Soybean sprout and radish soup | Stir-fried shredded potatoes<br>Carrot<br>Pan-fried tofu<br>Kimchi with napa cabbage<br>Wild raspberries<br>Seasoned mung bean sprouts<br>Ssamjang<br>Cabbage with cucumber<br>Korean melon<br>Rice with green peas | Stir-fried eggplant<br>Roasted seaweed ("Gim")<br>Pan-fried tofu<br>Perilla seed soup with radish<br>Kimchi with napa cabbage<br>Seasoned spinach<br>Ssamjang<br>Rice with green peas<br>Kiwi and tomato                                                             |
| <b>Lunch</b>   |                                                                                                                                 | Pickled Radish ("Danmuji")<br>Pear<br>Kimchi with napa cabbage<br>Vegetable curry rice<br>Soybean sprout and radish soup<br>Kiwi<br>Traditional Korean Rice cookie ("Yakgwa")                                                             | Stir-fried potatoes<br>Kimchi with napa cabbage<br>Soybean sprout and radish soup<br>Cherry tomato<br>Cabbage<br>Cherry tomato and pear<br>Rice with beans                                                          | Cubed radish kimchi ("Kkakdugi")<br>Acorn jelly salad ("Dotori-muk")<br>Perilla seed soup with radish<br>Seasoned radish salad<br>Boiled chestnut<br>Kimchi with napa cabbage<br>Seasoned spinach and lettuce<br>Pan-fried zucchini ("Hobakjeon")<br>Rice with beans |
| <b>Dinner</b>  | Seaweed and cucumber vinegared salad<br>Kimchi with napa cabbage<br>Soybean paste soup<br>Lettuce with ssamjang (soybean paste) | Seasoned cucumber salad<br>Seaweed soybean paste soup<br>Kimchi with napa cabbage<br>White rice cake ("Baekseolgi")<br>Lettuce with ssamjang<br>Seasoned aster scaber (Korean                                                             | Stir-fried eggplant<br>Seasoned soy sauce<br>Kimchi with napa cabbage<br>Soft tofu<br>Ssamjang<br>Braised soybeans ("Kongjaban")                                                                                    |                                                                                                                                                                                                                                                                      |

|  |                                                                                   |                                                                     |                                              |  |
|--|-----------------------------------------------------------------------------------|---------------------------------------------------------------------|----------------------------------------------|--|
|  | Rice with beans<br>Tomato<br>Stir-fried shiitake mushrooms<br>Green chili peppers | mountain herb)<br>Rice with beans<br>Soybean sprout and radish soup | Black rice<br>Soybean sprout and radish soup |  |
|--|-----------------------------------------------------------------------------------|---------------------------------------------------------------------|----------------------------------------------|--|
